# Supplementary material
Source: publisher site journal article supplement (https://www.dovepress.com/article/582182)
Supplement: Supplementary file 1 [file 582182%20Supplementary%20material%20appendix%201.docx]

Supplementary Material Appendix 1 Summary of the included studies

| No. | Ref. | Year | Study type | Patients number | Age (year) | Intervention | Result (weight) | Result (Semen) |
| --- | --- | --- | --- | --- | --- | --- | --- | --- |
|  |  |  |  |  |  |  |  |  |
| 1 | Gao et al. [14] | 2024 | interventional | 34 | 18 in the range of 20 years old to 25 years old, 11 in the range of 25 years old to 30 years old, and 5 in the range of 30 years old to 35 years old | bariatric surgery | pre-surgery BMI median (37.42 ± 3.64) versus post-surgery BMI median (28.21 ± 3.43) | Sperm concentration, total motility, survival rate, and sperm morphology parameters exhibited a significant decline at 3 months but demonstrated a significant improvement at 6 and 12 months postoperation. |
| 2 | Abouelgreed et al. [15] | 2023 | observational | 54 | 46 ± 4.83 | bariatric surgery | pre-surgery BMI median (41.3 ± 4.1) versus post-surgery BMI median (28.5 ± 3.22) | As regards the hormonal profile, sex hormone binding globulin, total and free testosterone improved significantly after 12- and 18-months following sleeve gastrectomy. There was a significant increase in sperm count and total sperm number during the follow-up after sleeve gastrectomy (*p* < 0.05), however, there were no significant changes in other semen parameters. |
| 3 | Legro et al. [16] | 2015 | observational | 6 | 35.6 ± 9.5 | bariatric surgery | In month 1, 3, 6 and 12 after the surgery, BMI was significant reduced compared with the baseline | Study visits took place at baseline, then 1, 3, 6 and 12 months after surgery, and there were no significant changes of serial semen parameters. |
| 4 | El Bardisi et al. [17] | 2016 | observational | 46 | 37.0 ± 6.0 | bariatric surgery | pre-surgery BMI median (71.4) versus post-surgery BMI median (46.9) | The increase in sperm concentration was statistically significant in men with azoospermia and oligospermia (both *p* < 0.05), whereas serum testosterone was statistically significant in all groups (*p* < 0.001). Out of the 19 patients who initially had oligospermia, the sperm concentration decreased or remained unchanged in two (10%), increased but remained less than 15 million/ml in 11 (58%), and increased to over 15 million in six patients (32%). |
| 5 | Samavat et al. [18] | 2017 | observational | 23 | 45.8 ± 7.4 | bariatric surgery | pre-surgery BMI median (45.8 ± 7.4) versus post-surgery BMI median (34.7 ± 5.3) | After 6 months from surgery, a positive trend in the progressive/total sperm motility and number was observed, though only the increase in semen volume and viability was statistically significant (*p* < 0.05, respectively). A decrease in the seminal interleukin-8 levels and in the sperm DNA fragmentation index was also present after bariatric surgery, whereas these parameters even increased in non-operated subjects. |
| 6 | Calderón et al. [19] | 2019 | observational | 15 | 40.0 ± 8.0 | bariatric surgery | pre-surgery BMI median (50 ± 10) versus post-surgery BMI median (32 ± 7) | The sperm volume showed a small decrease after surgery, while the rest of sperm characteristics remained mostly unchanged |
| 7 | Carette et al. [20] | 2019 | interventional | 46 | 38.9 ± 7.9 | bariatric surgery | pre-surgery BMI median (44.1 ± 5.7) versus post-surgery BMI median (31.4 ± 5.3) | Total sperm count tended to be lower at 6 months and showed a significant decrease at  12 months in surgery groups, at 269.5 million (296.8 to 242.2 million; *p* = 0.0021). Total sperm count at 12 months relative to baseline was 241.4 million (*p* = 0.0391) after gastric bypass and 291.1 million (*p* = 0.0080) after sleeve gastrectomy. |
| 8 | Wood et al. [21] | 2020 | interventional | 18 | 39.0 ± 16 | bariatric surgery | pre-surgery BMI median (43.9 ± 11.6) versus post-surgery BMI median (32.3 ± 5.5) | After 6 months of the bariatric surgery, total testosterone more than doubled (294.5 to 604 ng/dL, *p* < 0.0001). Worsening of sperm concentration and total ejaculated sperm count were also noticed, and 2 patients became azoospermic after the surgery. Sperm DNA fragmentation, however, improved after the procedure. |
| 9 | Fariello et al. [22] | 2021 | interventional | 15 | Not mentioned | metabolic surgery | The patients showed a significant reduction of BMI after surgery, especially when the pre-surgery values were compared with the values from the 6 months postsurgery (*p* < 0.0001) | The semen analysis showed increases in volume, sperm progressive motility, and in sperm morphology and a decrease in immotile sperms. Sperm mitochondrial activity and sperm DNA integrity were improved, and the levels of seminal lipid peroxidation were decreased. |
| 10 | Velotti et al. [23] | 2021 | observational | 35 | 36.4 ± 5.2 | bariatric surgery | The mean BMI significantly decreased after the surgery (32.0 ± 1.22 kg/m2 versus 39.56 ± 1.51 kg/m2, *p* =0.001) | A significant increase, after bariatric surgery, in semen volume, total sperm concentration, progressively motile sperm count, and sperm morphology. |
| 11 | Reis et al. [24] | 2012 | interventional | 20 | 39.3 ± 11.3 | nutritional education for low-energy diet and intensive behavior modification for daily physical activity guided by multidisciplinary team (nutritionist, physical educator, and psychologist), and subsequent gastric bypass surgery | From the baseline to month 4 and month 20, the treatment group presented a mean reduction in BMI of 12.6 and 24.7 respectively, (*p* < 0.0001) | There was no significant difference among parameters of the semen analysis profile between groups at the baseline, month 4, and month 20 in the treatment group. |
| 12 | Håkonsen et al. [25] | 2011 | interventional | 43 | The median (range) age was 32 (20-59) years | weight loss program (a healthy diet and daily exercise) | The median (range) weight loss was 22 (4; 39) kg, corresponding to a median percentage weight loss on 15%, ranging from 3.5% to 25.4%. | There was an increase in total sperm count (*p* = 0.02), semen volume (*p* = 0.04), testosterone (*p* = 0.02). |
| 13 | Sharma et al. [26] | 2024 | interventional | 20 in low-energy diet group and 23 in brief dietary group | Mean age of men was 39.5 ± 7.5 in brief dietary intervention group and 37.7 ± 6.6 years in the low-energy diet group | low-energy diet or brief dietary intervention | Men in the low-energy diet group lost weight (17.6 kg ± 7.7); Men in the brief dietary intervention group lost weight (6.3 kg ± 6.4) | ompared with baseline, total motility increased 35% to 52% after low-energy diet, and 43% to 50% after brief dietary intervention; Progressive motility increased 29% to 46% after low-energy diet, and 33% to 44% after brief dietary intervention. |
| 14 | Andersen et al. [27] | 2022 | interventional | 37 | 41.1 ± 9.7 | 8 weeks of low-calorie diet, followed by 52 weeks of liraglutide in combination with exercise training | The men lost on average 16.5 kg (95% CI: 15.2–17.8) body weight during the lowcalorie diet | The men increased sperm concentration 1.49-fold (95% CI: 1.18–1.88, *p* < 0.01) and sperm count 1.41-fold (95% CI: 1.07–1.87, *p* < 0.01). These improvements were maintained for 52 weeks in men who maintained the weight loss, but not in men who regained weight. Semen volume, sperm motility and motile sperm count did not change. |
| 15 | Faure et al. [28] | 2014 | observational | 6 | 31.8 ± 6.3 | dietary advices | After several months of a lifestyle program, all 6 men lost abdominal fat. | The rate of sperm DNA fragmentation index of all 6 men decreased: 9.5% versus 31%, 24% versus 43%, 18% versus 47%, 26.3% versus 66%, 25.4% versus 35% and 1.7% versus 25%. In seminal plasma, the amount of superoxide dismutase 2 has significantly increased (*p* = 0.0139) while in parallel carbonylated proteins have decreased. Furthermore, all spouses got pregnant. All pregnancies were brought to term. |
| 16 | La Vignera et al. [29] | 2023 | interventional | 35 in urofollitropin group, 35 in liraglutide group and 40 in testosterone gel group | 26.0 ± 6.0 | a standard low-carbohydrate diet and liraglutide | A significant reduction in body weight of 10.3% (116 ± 10 versus 104 ± 6 kg, *p* < 0.05), a BMI reduced by 16.7% (36 ± 3 versus 30 ± 2 kg/m2, *p* < 0.05) in the liraglutide group | Patients treated with liraglutide showed significant improvement in conventional sperm parameters, total testosterone and sex hormone-binding  globulin serum levels compared to baseline, urofollitropin group and testosterone gel group. |
| 17 | Gregorič et al. [30] | 2024 | interventional | 25 (13 in semaglutide group and 12 in testosterone undecanoate group | aged 50 (46–60) years | semaglutide or intramuscular testosterone undecanoate | Body weight (-6 kg (-15; -2) versus 0.5 kg (-2; 2,2), *p* = 0.007) and BMI (-2.1 kg/m2 (-4.6; -0.6) versus 0.2 kg/m2 (-0.6; 0.7), *p* = 0.005) decreased significantly in semaglutide compared to testosterone undecanoate | In the semaglutide group, there was a significant increase in morphologically normal sperm from baseline to the end of the study (2% [2; 3.5] versus 4% [2; 5.5]; p = 0.012), whereas sperm concentration and total number decreased significantly in the testosterone undecanoate group. Compared to testosterone undecanoate, the semaglutide group had a significantly higher number of morphologically normal sperm, sperm concentration and total number. |
| 18 | Kim et al. [31] | 2016 | interventional | Study 1: enclomiphene citrate group (41) and testosterone gel group (43)  Study 2: enclomiphene citrate group (44) and testosterone gel group (42) | Study 1: enclomiphene citrate group (49.1 ± 7.4) and testosterone gel group (47.4 ± 7.2)  Study 2: enclomiphene citrate group (47.3 ± 8.8) and testosterone gel group (45.0 ± 8.2) | enclomiphene citrate or testosterone gel | Not mentioned | Total testosterone levels increased between baseline and after 16 weeks of treatment in all the enclomiphene citrate and testosterone gel groups. Enclomiphene citrate maintained sperm concentration in the normal range over the treatment period, while there was a marked reduction in spermatogenesis in the testosterone gel group. |
|  |  |  |  |  |  |  |  |  |
| 19 | Panner Selvam et al. [32] | 2023 | interventional | 31 | 36.9 ± 1.5 | clomiphene citrate | Not mentioned | Clomiphene citrate significantly improved baseline sperm concentration (4.5 ± 6.8 × 106/mL versus 11.4 ± 15.5 × 106/mL, *p* < 0.05) and motility (31.5% ± 21.5% versus 42.6% ± 14.7%, *p* < 0.05). |
|  |  |  |  |  |  |  |  |  |
| 20 | Rosety et al. [33] | 2017 | interventional | 45 | 36.3 ± 3.2 | aerobic training program | Not mentioned | After the completion of the training program, sperm count, motility and normal morphology were significantly increased. A second key finding was that exercise improved reproductive hormone levels by increasing serum testosterone. |
| 21 | Ahmadi-Asrbadr et al. [34] | 2022 | interventional | 15 ( 5 patients in the letrozole group, 5 patients in the human chorionic gonadotropin group and 5 patients in the letrozole plus human chorionic gonadotropin group | Not mentioned | letrozole or human chorionic gonadotropin or the combination of letrozole and human chorionic gonadotropin | Not mentioned | After the intervention, there were statistically significant differences between all variables compared to those before the intervention (*p* < 0.05); Also, the rate of change in the combination of letrozole and human chorionic gonadotropin group was much more favorable than the other two groups. |
| 22 | Rafiee et al. [35] | 2016 | interventional | 50 | Not mentioned | exercise or vitamin C | In exercise group, the average of weight loss was 8.5 kg in those with BMI more than 30. | Weight loss increased the volume of semen in participants with more than 30 body mass index (*p* = 0.001). The increased concentration of sperm per mL of semen in BMI more than 30 (*p* = 0.003) was significant. Improving sperm motility after two hours in participants with more than 30 (*p* = 0.01) BMI was significant. In vitamin C group, the improvement of sperm concentration in participants who had more than 30 (*p* = 0.02) BMI was significant. Sperm motility improved in both the exercise group and vitamin C group. |
| 23 | Zhao et al. [36] | 2022 | interventional | 34 in the Qijing Formula group and 33 in the Huanshao Capsule group | Mean age of men was 36.4 ± 3.97 in Qijing Formula group and 35.89 ± 3.65 years in the Huanshao Capsule group | Huanshao Capsule or Qijing Formula | Not mentioned | Compared with the baseline, the semen volume, total sperm count and concentration showed statistically significant differences after the treatment of Qijing Formula or Huanshao Capsule (*p* < 0.05), and the change in these indicators were more significant in the Qijing Formula group compared with the Huanshao Capsule (*p* < 0.05). |
| 24 | Wang et al. [37] | 2021 | interventional | 94 in the Letrozole plus Fufangxuanju Capsule plus Vitamin E group and 94 in the Clomi-phenecitrate plus Fufangxuanju Capsule plus Vitamin E group | 32.2 ± 5.6 | Letrozole plus Fufangxuanju Capsule plus Vitamin E or Clomiphene Citrate plus Fufangxuanju Capsule plus Vitamin E | Not mentioned | After treatment, the sperm concentration and the sperm forward movement rate were significantly improved in both groups,and the sperm concentration in Letrozole plus Fufangxuanju Capsule plus Vitamin E group was significantly higher than that in Clomi-phenecitrate plus Fufangxuanju Capsule plus Vitamin E group [(26.32士2.59)×106/ml versus (21.48士3.37)×106/ml] (*p* < 0.05). |
| 25 | Chen et al. [38] | 2022 | interventional | 100 in the Letrozole plus Fufangxuanju Capsule plus Vitamin E group and 100 in the Clomifene plus Fufangxuanju Capsule plus Vitamin E group | Mean age of men was 33.62±8.41 in Letrozole plus Fufangxuanju Capsule plus Vitamin E group and 32.13±8.27 years in the Clomifene plus Fufangxuanju Capsule plus Vitamin E group | Letrozole plus Fufangxuanju Capsule plus Vitamin E group or Clomifene plus Fufangxuanju Capsule plus Vitamin E | Not mentioned | After treatment, the semen volume, sperm concentration and the percentage of forward motility in both groups were significantly higher than their respective baselines (*p* < 0.05). The improvement degree in the Letrozole plus Fufangxuanju Capsule plus Vitamin E group was better than that in the Clomifene plus Fufangxuanju Capsule plus Vitamin E group. |
| 26 | Ji et al. [39] | 2024 | interventional | 45 in the Jianyang Yikan Formula plus Levocarnitine group and 45 in the Levocarnitine group | Mean age of men was 30.07 ± 4.91 in Jianyang Yikan Formula plus Levocarnitine group and 29.89 ± 5.03 years in the Levocarnitine group | Jianyang Yikan Formula plus Levocarnitine or Levocarnitine | Not mentioned | Sperm concentration, semen volume, percentage of progressive motility, and total sperm count increased in both groups after treatment( *p* ＜ 0.05), and these parameters were better in the Jianyang Yikan Formula plus Levocarnitine group compared with the Levocarnitine group( *p* ＜ 0.05)． |
| 27 | Sun et al. [40] | 2025 | interventional | 31 in the Shuangshitonglin Capsule plus Levocarnitine group and 35 in the Levocarnitine group | Mean age of men was 36.45 ± 7.72 in Shuangshitonglin Capsule plus Levocarnitine group and 36.49 ± 7.78 years in the Levocarnitine group | Shuangshitonglin Capsule plus Levocarnitine or Levocarnitine | Not mentioned | After treatment, there was prominent improvement in the sperm concentration, forward motility sperm rate, normal morphology sperm rate and DNA fragmentation index (*p* < 0.01). Moreover, the improvement degrees of forward motility sperm rate , normal morphology sperm rate and sperm DNA fragmentation index in the observation group were superior to those in the control group (*p* < 0.05). |
| 28 | Wang et al. [41] | 2017 | interventional | 30 | Not mentioned | L-carnitine plus aerobic exercises | Not mentioned | The rates of sperm malformation and DNA fragmentation index were both significantly reduced after treatment. |

Data are presented as mean ± standard deviation or range. **Abbreviation:** BMI, body mass index.
